# Supplementary material for: Effects of Dexmedetomidine on the Localization of α2A-Adrenergic and Imidazoline Receptors in Mouse Testis
Source: MDPI journal article supplement (doi:10.3390/app122010409), 2022-10-15

Table S1

Primer

P450<sub>scc</sub>: 5-AGGTCCTTCAATGAGATCCCTT-3  
3-TCCCTGTAAATGGGGCCATAC-5  
3 $\beta$  HSD: 5-CCTCCGCCTTGATACCAGC-3  
3-TTGTTTCCAATCTCCCTGTGC-5  
LHR: 5-CCTTGTTCTCAAAAGAGATGTTGAA-3  
3-TGACCAGAACTGGAGAAGATGATA-5  
FSHR: 5-ATTTTCTCCAGGTCCCCAAA-3  
3-TCTCCTTGCTGGCATTCTTG-5  
LH: 5-CTGAGCCCAAGTGTGGTGT-3  
3-CACAGATGCTGGTGGTGAAG-5  
FSH: 5-AAGTC ATCCAGCTTTGCAT-3  
3-TCCCTGGTGTAGCAGTAGCC-5  
Imidazoline receptor: 5-GTGAGATCGACGAATCTGTGAAA-3  
3-GTTGTATAGGTGCTGCAGGTTATC-5  
 $\alpha$ 2A adrenergic receptor: 5-TTCTTTTTTACCTACACGCTCA-3  
3-TGTAGATAACAGGGTTCAGCGA-5  
Caspase3: 5-AAAGGCTGGAACCCTTGTTT-3  
3-GCACCTTGCCTTCAATGAGT-5  
CAT: 5-CTCAGGTGCGGACATTCTATAC-3  
3-GACTCCATCCAGCGATGATTAC-5  
GPx: 5-TTGAGAAAGGAGATGTGAACGG-3  
3-CAAAGTTCCAGCGGATGTCA-5  
SOD2: 5-ATGGTGGGGGACATATT-3  
3-GAACCTTGGACTCCCACAGA-5  
ABCD1: 5-GAGGGAGGTTGGGAGGCAGT-3  
3-GAGGGAGGTTGGGAGGCAGT-5  
ABCD3: 5-CTGGGCGTGAAATGACTAGATTGG-3  
3-AGCTGCACATTGTCCAAGTACTCC-5  
GRP78: 5-AACCCAGATGAGGCTGTAGCA-3  
3-ACATCAAGCAGAACCAGGTCAC-5  
OGG1: 5-GATTGGACAGTGCCGTAA-3  
3-GGAAGTGGGAGTCTACAG-5  
Ki67: 5-CCATATGCCTGTGGAGTGGAA-3  
3-CCACCCTTAGCGTGCTCTTGA-5  
Top2a: 5-CAACTGGAACATATACTGCTCCG-3  
3-GGGTCCCTTTGTTTGTTATCAGC-5  
Sycp3: 5-TCAGCAGAGAGCTTGGTCGG-3  
3-GATGTTTGCTCAGCGGCTCC-5  
Mlh1: 5-TTCTACCTATGGCTTTCGTGGTGA-3  
3-TGCCTGCACAGGGTTTAGGAG-5  
Acr: 5-TCCTGAAGGCAAGATTGACACC-3  
3-TAGACTCCGGGACGCTTAGCAC-5  
Tnp1: 5-ACCAGCCGCAAGCTAAAGAC-3  
3-TTTCCTACTTTTCAGGACGCTC-5  
InhA: 5-CTCGAAGACATGCCGTTGG-3  
3-AGCT GGCTGGTCCTCACAG-5  
SHBG: 5-GCC CTG AGA CAC ATT GAC CCT-3  
3-CAG GGC AGG CAG GAG CG-5  
GAPDH: 5-TGAACGGGAAGCTCACTGG-3  
3-TCCACCACCCTGTTGCTGTA-5

Figure S1

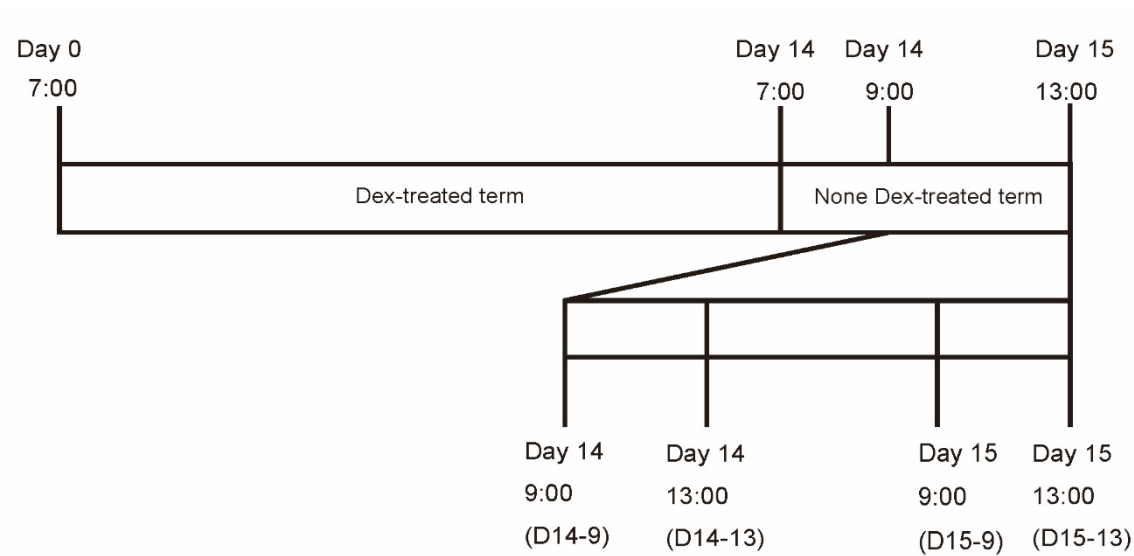

Figure S2

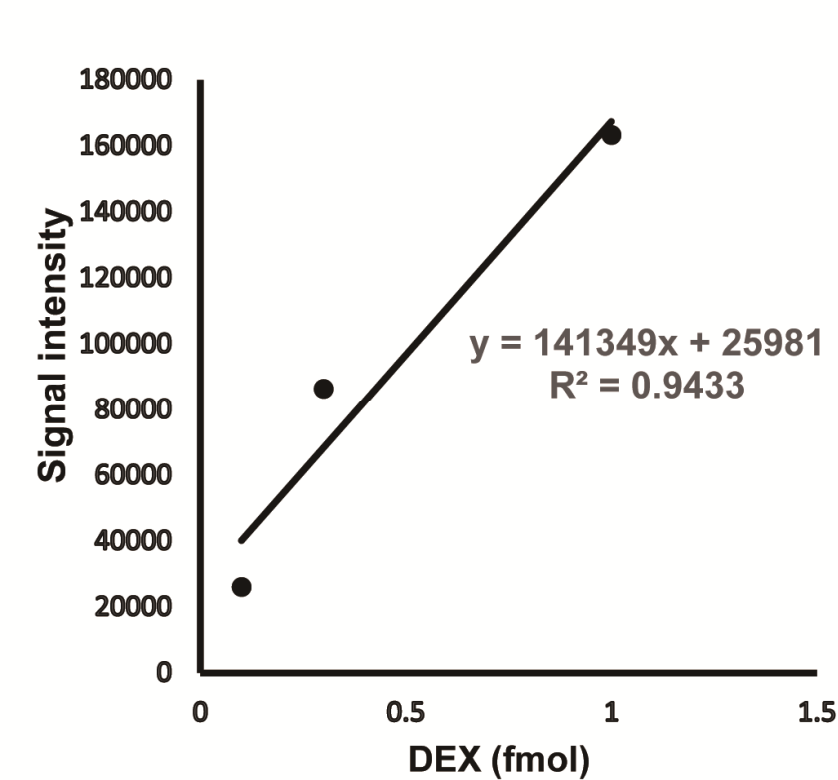

Supplement: s1 [file s1]
